# Supplementary material for: Human haematopoietic stem/progenitor cells express several functional sex hormone receptors
Source: PubMed Central journal article supplement (PMC4717849; doi:10.1111/jcmm.12712), 2015-10-30
Supplement: JCMM-20-134-s001.pdf [file JCMM-20-134-s001.pdf]

| HUMAN SEX HORMONE RECEPTOR | PRIMER SEQUENCES |                               | PRODUCT LENGTH (bp) |
|----------------------------|------------------|-------------------------------|---------------------|
| FSH-R                      | sense            | 5'-gcttctgagatctgtggaggtt-3'  | 231                 |
|                            | antisense        | 5'-ggacaaacctcagttcaatggc-3'  |                     |
| LH-R                       | sense            | 5'-cagaggccgtccaagacac-3'     | 330                 |
|                            | antisense        | 5'-atgctccgggctcaatgtat-3'    |                     |
| Prolactin-R                | sense            | 5'-gagcttcttctcacagagcca-3'   | 291                 |
|                            | antisense        | 5'-aagttcacttcagggttcagtgg-3' |                     |
| Androgen-R                 | sense            | 5'-cgacttcaccgcacctgatg-3'    | 296                 |
|                            | antisense        | 5'-acttctgtttcccttcagcgg-3'   |                     |
| Estrogen-R $\alpha$        | sense            | 5'-aggtgcctactacctggag-3'     | 397                 |
|                            | antisense        | 5'-cggctctttcgtatcccacct-3'   |                     |
| Estrogen-R $\beta$         | sense            | 5'-aatggtgaagtgtggctccc-3'    | 345                 |
|                            | antisense        | 5'-acttggtcgaacaggctgag-3'    |                     |
| Progesterone-R             | sense            | 5'-tcaactacctgaggccggat-3'    | 336                 |
|                            | antisense        | 5'-cagcatccagtctctcaca-3'     |                     |
