# Supplementary material for: Human haematopoietic stem/progenitor cells express several functional sex hormone receptors
Source: PubMed Central journal article supplement (PMC4717849; doi:10.1111/jcmm.12712), 2015-10-30

**A**

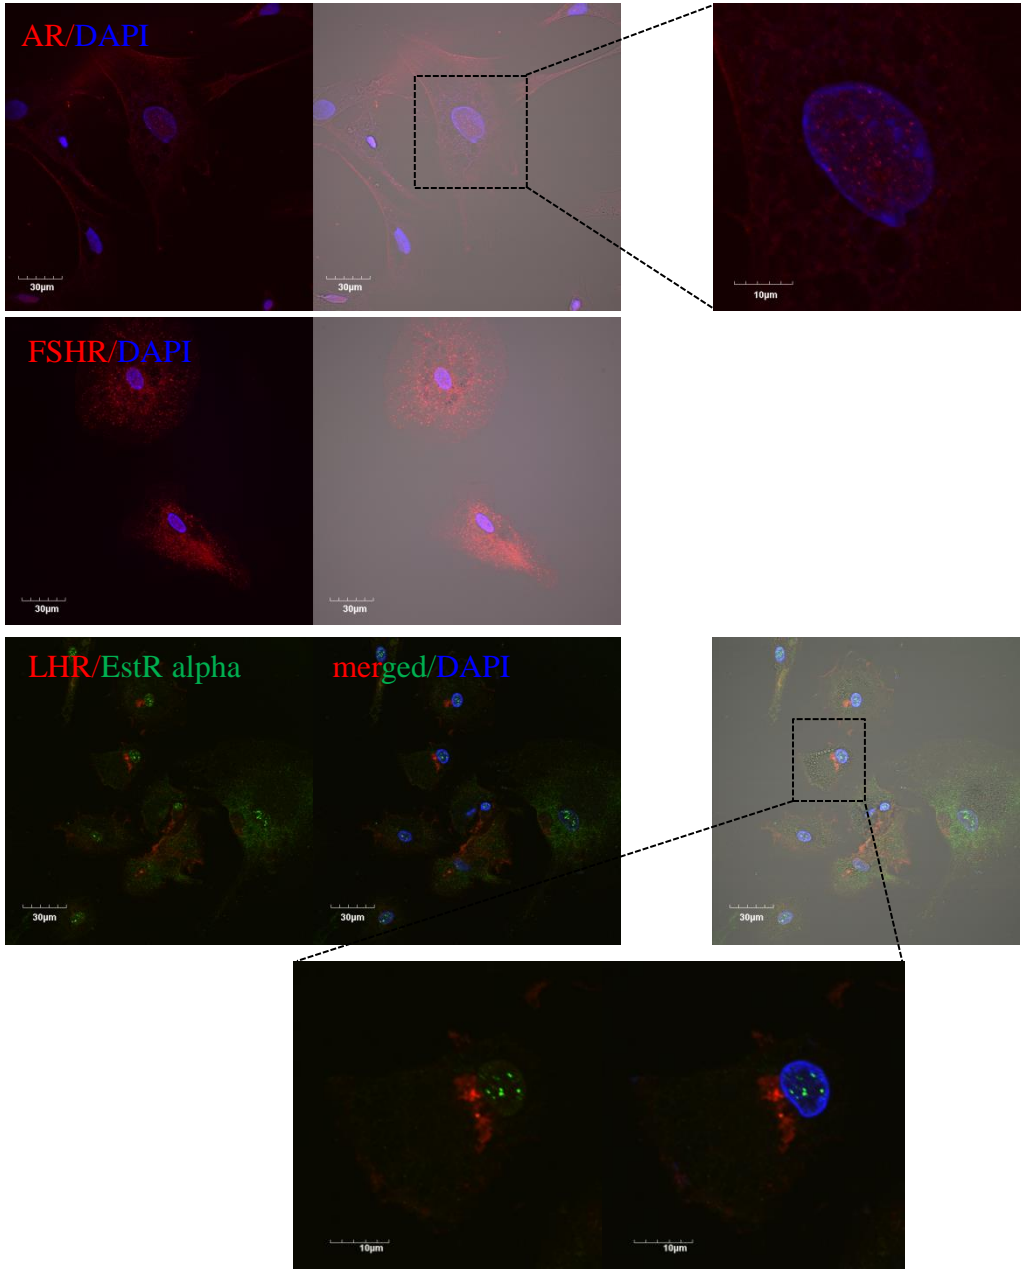

**B**

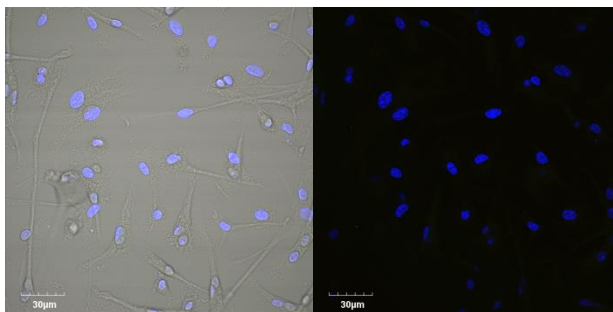

Supplement: JCMM-20-134-s003.pdf [file JCMM-20-134-s003.pdf]
